# Supplementary material for: A Platinized Carbon Fiber Microelectrode-Based Oxidase Biosensor for Amperometric Monitoring of Lactate in Brain Slices
Source: MDPI journal article supplement (doi:10.3390/s22187011), 2022-09-16
Supplement: s1 [file s1]

# Supplementary Materials

## **A Platinized Carbon Fiber Microelectrode-Based Oxidase Bio-sensor for Amperometric Monitoring of Lactate in Brain Slices.**

Cândida Dias<sup>1,2</sup>, Eliana Fernandes<sup>1</sup>, Rui M. Barbosa<sup>1,2</sup>, Ana Ledo<sup>1,2,\*</sup>

<sup>1</sup>Center for Neuroscience and Cell Biology, University of Coimbra, Portugal

<sup>2</sup>University of Coimbra, Faculty of Pharmacy, Portugal

\*Corresponding author

Ana Ledo

Faculty of Pharmacy and Center for Neuroscience and Cell Biology

University of Coimbra

Health Science Campus

Azinhaga de Santa Comba

3000-548 Coimbra

Portugal

[analedo@ff.uc.pt](mailto:analedo@ff.uc.pt)

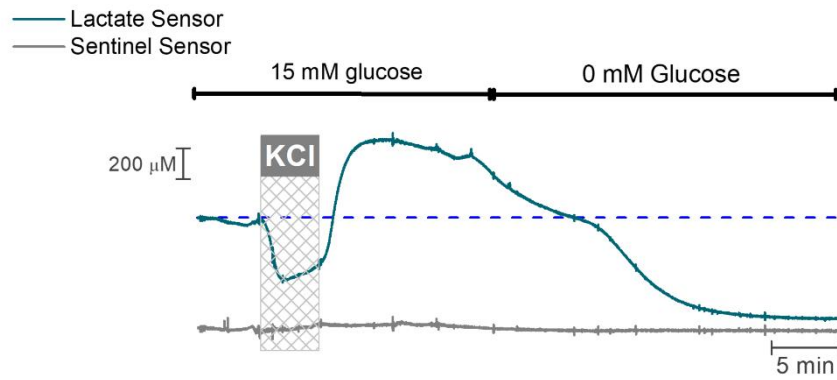

Figure S1 - Lactate measurements with CFM/Pt-based lactate microbiosensors (CFM/Pt-LOx-PU-PD; blue) in the CA1 subregion of hippocampal slices in the presence of a sentinel microsensor (CFM/Pt-Null-PU-PD; grey) with bath KCl stimulation (60 mM; 5 min) in the presence of 15 mM glucose and then with removal of glucose from the perfusion media.
